# Supplementary material for: The effect of copper species in copper-ceria catalysts: structure evolution and enhanced performance in CO oxidation
Source: Royal Society of Chemistry journal article supplement (doi:10.1039/c6ra08204a), 2016-01-01
Supplement: c6ra08204a1.pdf [file c6ra08204a1.pdf]

## The effect of copper species in copper-ceria catalysts: structure evolution and enhanced performance in CO oxidation

Wenshuang Zhu,<sup>a</sup> Ke Tang,<sup>a</sup> Jing Li,<sup>a</sup> Wei Liu,<sup>a</sup> Xiaoran Niu,<sup>a</sup> Genyuan Zhao,<sup>a</sup> Xueqin Ma,<sup>a</sup> Zhaohui Liu,<sup>b</sup> Huiying Wei\*,<sup>a</sup> and Yanzhao Yang\*,<sup>a</sup>

<sup>a</sup>Key Laboratory for Special Functional Aggregate Materials of Education Ministry, School of Chemistry and Chemical Engineering, Shandong University, Jinan, 250100, P. R. China.

<sup>b</sup>Shandong Academy of Agricultural Science, Jinan, 250100, P. R. China.

\*Corresponding Author: E-mail: yzhyang@sdu.edu.cn; Fax: +86-531-88564464; Tel: +86-531-88362988

Table S1 Primary particle size of P1-P6 calculated by Scherrer equation.

| samples | primary particle size (nm) |
|---------|----------------------------|
| P1      | 6.2                        |
| P2      | 5.3                        |
| P3      | 5.7                        |
| P4      | 5.8                        |
| P5      | 4.6                        |
| P6      | 5.5                        |

Table S2 N<sub>2</sub> adsorption-desorption characterization and the compositional data of the as prepared carbon spheres and precursors of P<sub>1</sub> and P<sub>4</sub> samples

| samples                      | Nominal ratio              | S <sub>BET</sub>               | D <sub>BJH</sub> | V <sub>BJH</sub>                |
|------------------------------|----------------------------|--------------------------------|------------------|---------------------------------|
|                              | Cu/Ce+Cu, % <sub>mol</sub> | m <sup>2</sup> g <sup>-1</sup> | nm               | cm <sup>3</sup> g <sup>-1</sup> |
| carbon spheres               | -----                      | 13.68                          | 4.2              | 0.022                           |
| precursors of P <sub>1</sub> | 0                          | 18.79                          | 3.4              | 0.039                           |
| precursors of P <sub>4</sub> | 2.5                        | 22.41                          | 3.8              | 0.045                           |

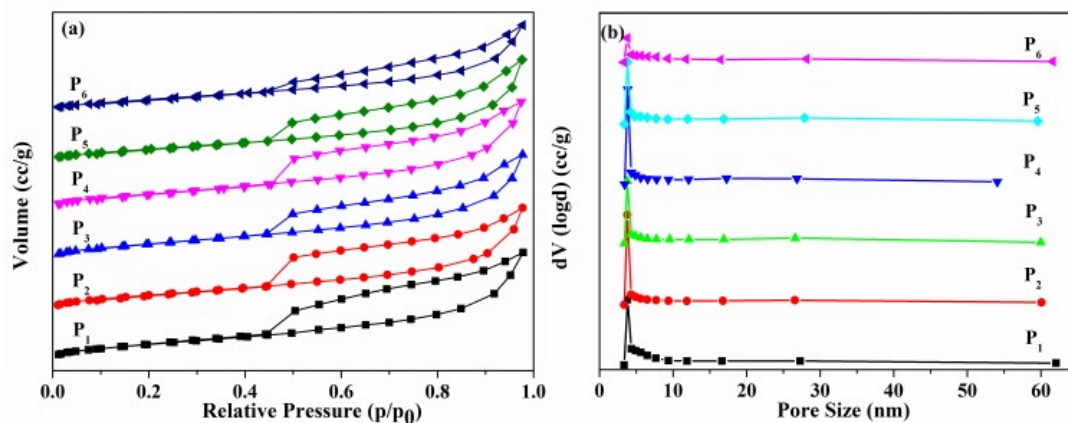

Fig. S1 N<sub>2</sub> adsorption-desorption isotherms of the pure and Cu<sup>2+</sup> doped CeO<sub>2</sub> (a) and the corresponding BJH pore size distribution curves (b)

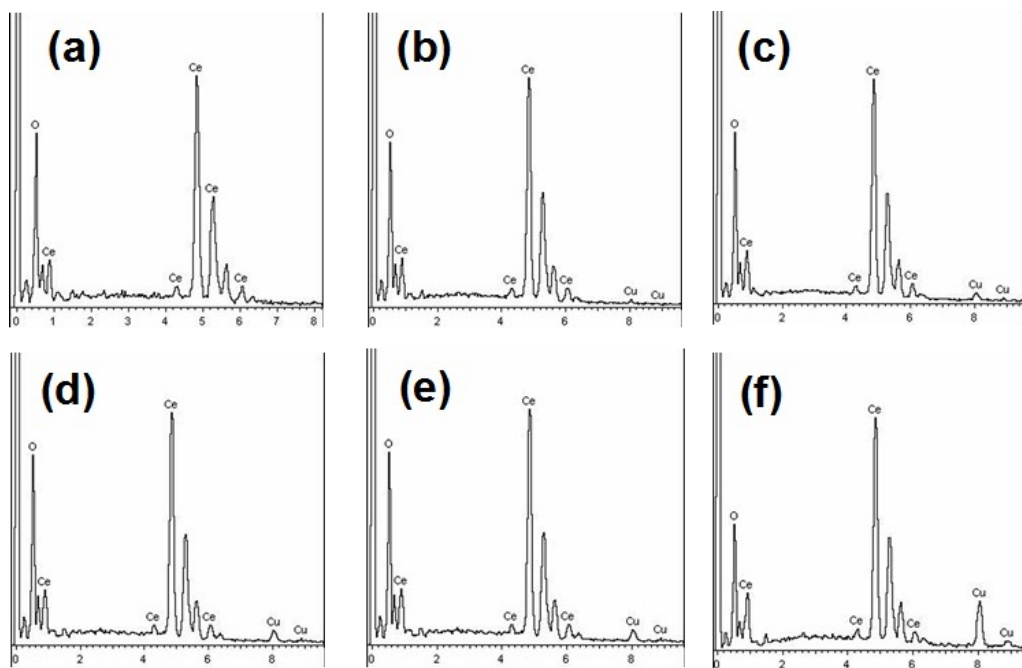

Fig. S2 EDS results of the pure and  $\text{Cu}^{2+}$  doped  $\text{CeO}_2$ : (a) P<sub>1</sub>, (b) P<sub>2</sub>, (c) P<sub>3</sub>, (d) P<sub>4</sub>, (e) P<sub>5</sub> and (f) P<sub>6</sub>.

Table. S3 AES-ICP data of P<sub>2</sub>-P<sub>6</sub>

| samples        | Cu/Cu+Ce         |
|----------------|------------------|
|                | % <sub>mol</sub> |
| P <sub>2</sub> | 3.22             |
| P <sub>3</sub> | 8.30             |
| P <sub>4</sub> | 14.07            |
| P <sub>5</sub> | 21.77            |
| P <sub>6</sub> | 31.80            |

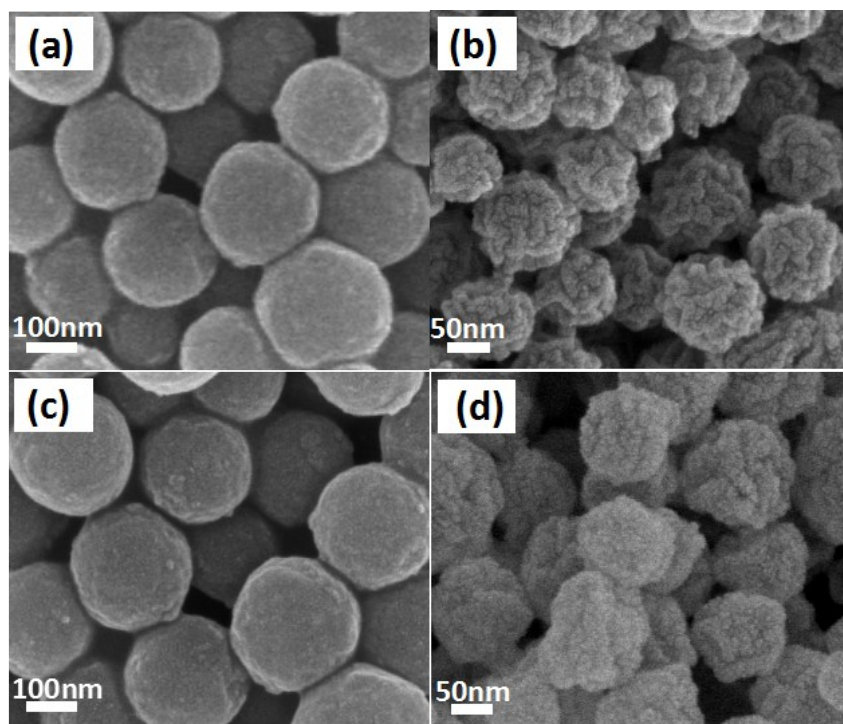

Fig. S3 The SEM images of precursors of  $P_1$  samples (a),  $P_1$  (b), precursors of  $P_4$  samples (c) and  $P_4$  (d)

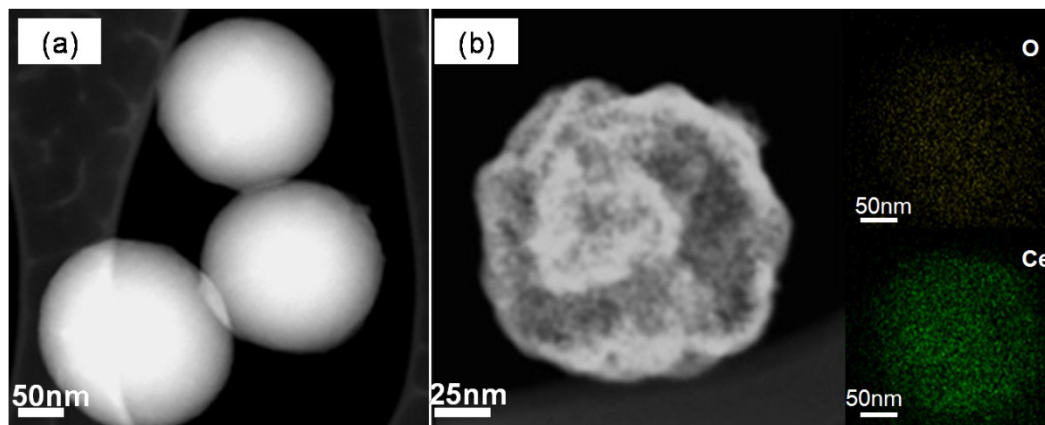

Fig. S4 The STEM images of precursors of  $P_1$  samples (a) and  $P_1$  (b); EDS-mapping image of an individual nanosphere, which is marked in Fig. D (b).

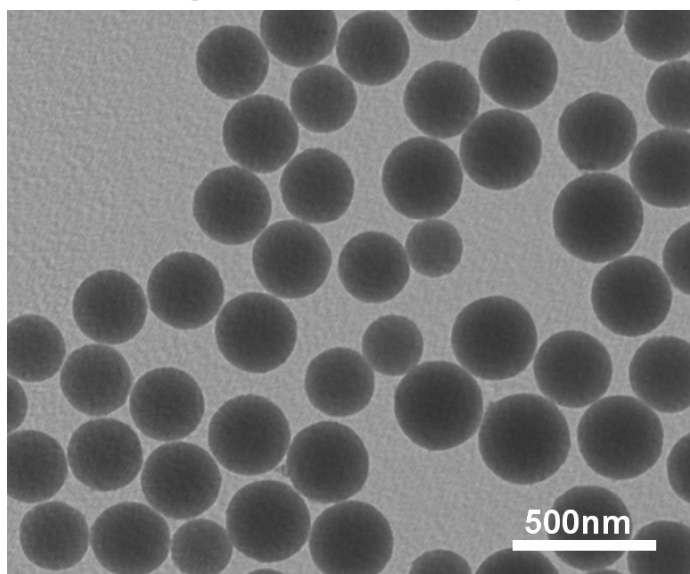

Fig. S5 The TEM images of the carbon nanospheres

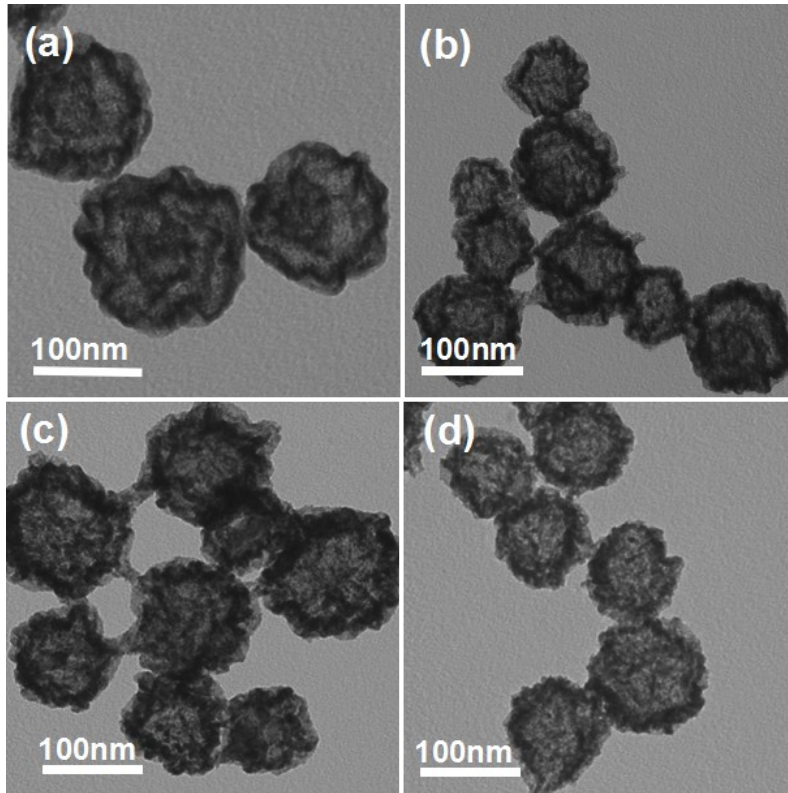

Fig. S6 The TEM images of the Cu<sup>2+</sup> doped CeO<sub>2</sub> (a-d): P2,P3, P5 and P6.

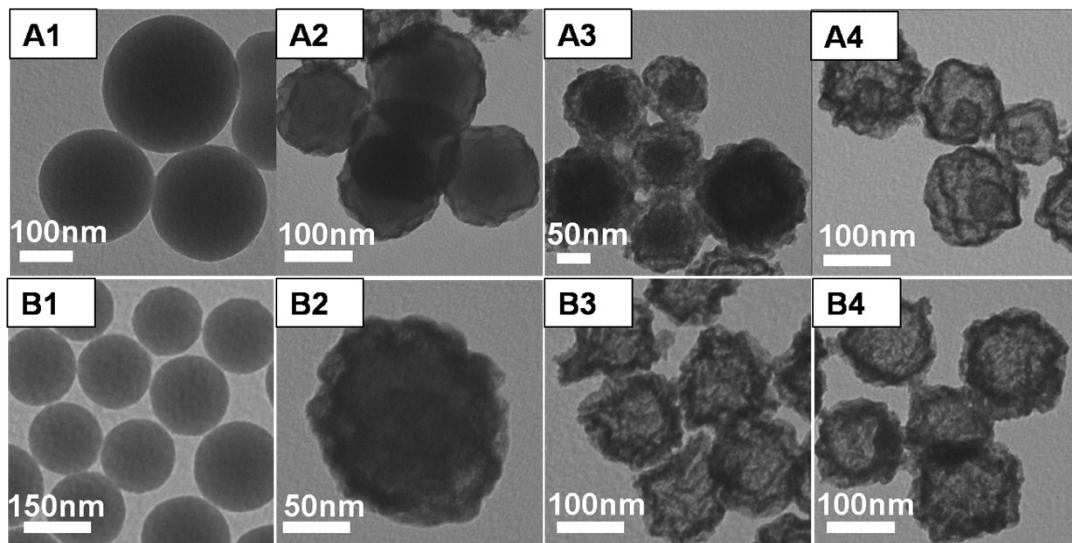

Fig. S7 TEM images of P1 (A1-A4) and P5 (B1-B4) with a series of calcination temperature and time. (A1: 280 °C, 10 min; A2: 300 °C, 10 min; A3: 320 °C, 10 min; A4: 320 °C, 50 min; B1 260 °C, 10 min; B2: 280 °C, 10 min; B3: 280 °C, 50 min; B4: 320 °C, 10 min)

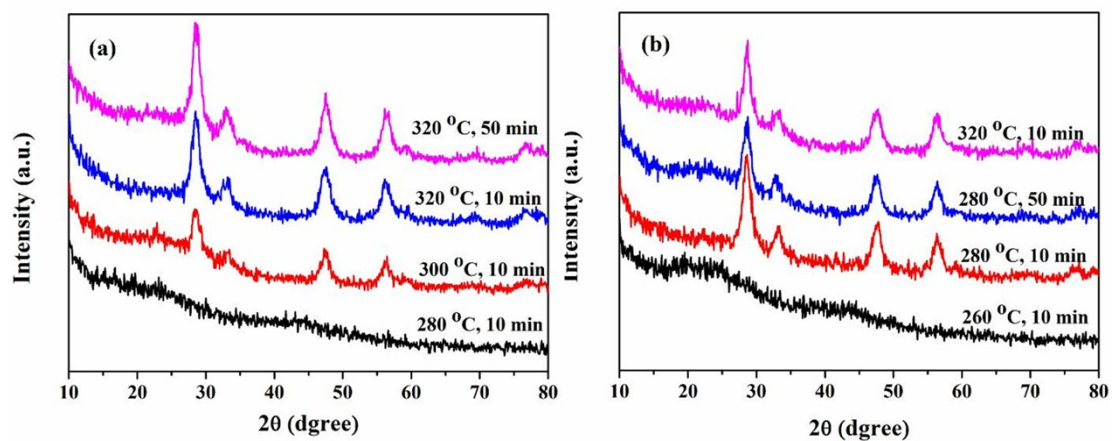

Fig. S8 The XRD patterns of P1 (a) and P5 (b) with a series of calcination temperature and time

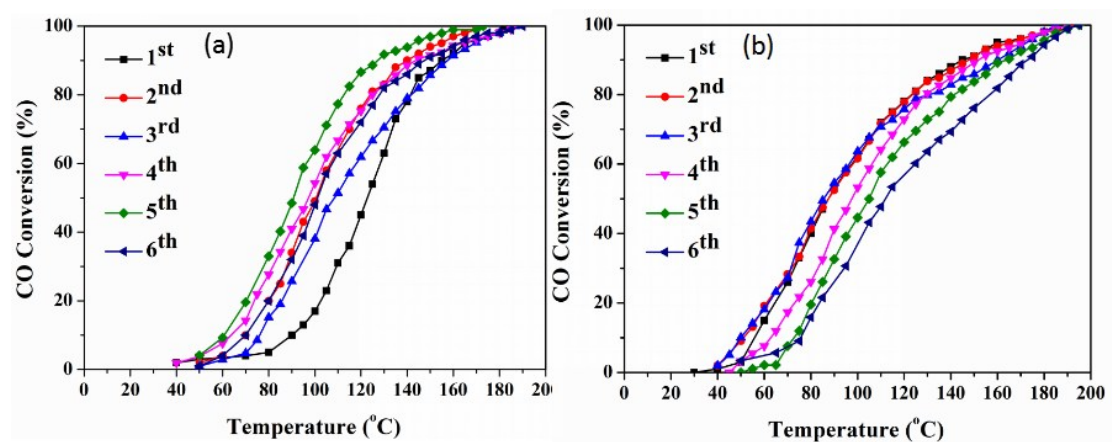

Fig S9 Catalytic performance of P<sub>5</sub> (a) and P<sub>6</sub> (b) in different runs
